# Supplementary material for: Acceptability and feasibility of strategies to promote healthy dietary choices in UK secondary school canteens: a qualitative study
Source: Research Square preprint supplement (doi:10.21203/rs.3.rs-551209/v1), 2021-05-25
Supplement: Supplementary file 1 [file 7b58c7fccf4d1a17ac610cc1.docx]

Additional file 3. Coding tree for thematic analysis

Major interpretative themes for thematic analysis (objective 1 – 3)

Codes pertaining to attitudes related to specific nudge strategies or specific messaging (objective 4)
